# Supplementary material for: Na+ influx via Orai1 inhibits intracellular ATP-induced mTORC2 signaling to disrupt CD4 T cell gene expression and differentiation
Source: eLife. 2017 May 11;6:e25155. doi: 10.7554/eLife.25155 (PMC5459575; doi:10.7554/eLife.25155)
Supplement: Figure 2—source data 1. — Single cell suspensions were prepared from WT and Napahyh/hyh fetal liver chimerathymii, counted and then stained for Foxp3, CD25, CD4, and CD45.2 as described in Figure 2A. The absolute numbers and percentages of Foxp3+CD25+ cells were then calculated in CD4 and CD45.2 double positive cells. DOI: http://dx.doi.org/10.7554/eLife.25155.005 [file elife-25155-fig2-data1.xlsx]

## Sheet: Sheet1
Table showing absolute numbers and percentages of thymic Foxp3 Tregs in WT and Napahyh/hyh fetal liver chimeras.
	WT chimera				Napahyh/hyh chimera
	Total Thymocytes x10^6	CD4+ CD25+ Foxp3+ number x10^3	Foxp3+ % in CD4+		Total Thymocytes x10^6	CD4+ CD25+ Foxp3+ number x10^3	Foxp3+ % in CD4+
1	96	275.5	0.35		108	194.4	0.22
2	147	417.5	0.36		168	285.6	0.21
3	132	319.4	0.31		145	294.4	0.25
4	84	266.3	0.37		108	217.1	0.25
5	110	330	0.36		100	138	0.15
6	100	562.8	0.6		100	262.5	0.3
