# Supplementary material for: Na+ influx via Orai1 inhibits intracellular ATP-induced mTORC2 signaling to disrupt CD4 T cell gene expression and differentiation
Source: eLife. 2017 May 11;6:e25155. doi: 10.7554/eLife.25155 (PMC5459575; doi:10.7554/eLife.25155)
Supplement: Figure 2—source data 2. — WT and Napahyh/hyh CD4 T cells were purified from the spleen and lymph nodes of chimeras and differentiated into Foxp3+ cells in vitro. Shown here are the absolute numbers and percentages of Foxp3 cells obtained from Figure 2G. DOI: http://dx.doi.org/10.7554/eLife.25155.006 [file elife-25155-fig2-data2.xlsx]

## Sheet: Sheet1
Table showing absolute numbers and percentages of Foxp3 iTregs from WT and Napahyh/hyh CD4 T cell in vitro cultures.
	WT iTreg cultures			Napahyh/hyh iTreg cultures
	Foxp3+ %	Foxp3+ number		Foxp3+ %	Foxp3+ number
1	11	677		7.54	469
2	17.8	1654		11	1008
3	30.5	2457		19.3	1601
4	38.7	3360		26.1	2385
5	38	3280		13.3	1074
6	26.8	2369		16.4	1339
7	39.2	3186		17.2	1084
