# Supplementary material for: Na+ influx via Orai1 inhibits intracellular ATP-induced mTORC2 signaling to disrupt CD4 T cell gene expression and differentiation
Source: eLife journal article supplement (doi:10.7554/elife.25155), 2017-05-11
Supplement: supp [file elife-25155-supp-v2.zip]

Figure 6 -source data 1

| Enrichment by Pathway Maps |                                                                                                |          |
|----------------------------|------------------------------------------------------------------------------------------------|----------|
| Number                     | Maps                                                                                           | p-value  |
| 1                          | Immune response_Generation of memory CD4+ T cells                                              | 7.72E-08 |
| 2                          | Development_Cytokine-mediated regulation of megakaryopoiesis                                   | 3.92E-07 |
| 3                          | Immune response_Differentiation of natural regulatory T cells                                  | 9.28E-06 |
| 4                          | Immune response_CD40 signaling                                                                 | 1.16E-05 |
| 5                          | Apoptosis and survival_Anti-apoptotic TNFs/NF-kB/Bcl-2 pathway                                 | 3.27E-05 |
| 6                          | Immune response_CD137 signaling in immune cell                                                 | 3.38E-05 |
| 7                          | Transport_RAN regulation pathway                                                               | 3.41E-05 |
| 8                          | Apoptosis and survival_Granzyme A signaling                                                    | 4.14E-05 |
| 9                          | Immune response_CRTH2 signaling in Th2 cells                                                   | 4.47E-05 |
| 10                         | Signal transduction_PTMs in IL-23 signaling pathway                                            | 5.04E-05 |
| 11                         | Cell cycle_Role of Nek in cell cycle regulation                                                | 6.09E-05 |
| 12                         | Immune response_IL-2 activation and signaling pathway                                          | 9.12E-05 |
| 13                         | Development_PEDF signaling                                                                     | 9.12E-05 |
| 14                         | Development_G-CSF signaling                                                                    | 9.12E-05 |
| 15                         | Immune response_IL-15 signaling via JAK-STAT cascade                                           | 1.23E-04 |
| 16                         | Immune response_IFN alpha/beta signaling pathway                                               | 1.52E-04 |
| 17                         | Immune response_Th17, Th22 and Th9 cell differentiation                                        | 1.93E-04 |
| 18                         | Immune response_Th1 and Th2 cell differentiation                                               | 2.23E-04 |
| 19                         | Transcription_Epigenetic regulation of gene expression                                         | 2.42E-04 |
| 20                         | Immune response_CCR5 signaling in macrophages and T lymphocytes                                | 2.70E-04 |
| 21                         | Immune response_IL-10 signaling pathway                                                        | 4.10E-04 |
| 22                         | Immune response_IL-4 - antiapoptotic action                                                    | 4.58E-04 |
| 23                         | Immune response_Naive CD4+ T cell differentiation                                              | 4.87E-04 |
| 24                         | Immune response_IL-15 signaling                                                                | 4.99E-04 |
| 25                         | Apoptosis and survival_Regulation of Apoptosis by Mitochondrial Proteins                       | 7.22E-04 |
| 26                         | Development_GM-CSF signaling                                                                   | 7.68E-04 |
| 27                         | PDE4 regulation of cyto/chemokine expression in inflammatory skin diseases                     | 7.68E-04 |
| 28                         | Translation_IL-2 regulation of translation                                                     | 8.52E-04 |
| 29                         | Development_Regulation of telomere length and cellular immortalization                         | 9.53E-04 |
| 30                         | Immune response_IL-9 signaling pathway                                                         | 1.09E-03 |
| 31                         | Immune response_IL-16 signaling pathway                                                        | 1.16E-03 |
| 32                         | Development_Thrombopoietin signaling via JAK-STAT pathway                                      | 1.24E-03 |
| 33                         | Apoptosis and survival_APRIL and BAFF signaling                                                | 1.57E-03 |
| 34                         | Immune response_IL-27 signaling pathway                                                        | 1.74E-03 |
| 35                         | Immune response_IL-17 signaling pathways                                                       | 2.01E-03 |
| 36                         | Immune response_IL-18 signaling                                                                | 2.01E-03 |
| 37                         | Immune response_IL-23 signaling pathway                                                        | 2.04E-03 |
| 38                         | Apoptosis and survival_Lymphotoxin-beta receptor signaling                                     | 2.20E-03 |
| 39                         | Immune response_IL-7 signaling in B lymphocytes                                                | 2.45E-03 |
| 40                         | Signal transduction_AKT signaling                                                              | 2.45E-03 |
| 41                         | Immune response_IL-4 signaling pathway                                                         | 2.71E-03 |
| 42                         | Immune response_TNF-R2 signaling pathways                                                      | 3.00E-03 |
| 43                         | Immune response_NF-AT signaling and leukocyte interactions                                     | 3.63E-03 |
| 44                         | Immune response_TLR5, TLR7, TLR8 and TLR9 signaling pathways                                   | 3.99E-03 |
| 45                         | Development_TGF-beta receptor signaling                                                        | 4.76E-03 |
| 46                         | Immune response_T regulatory cell-mediated modulation of effector T cell and NK cell functions | 6.11E-03 |
| 47                         | ATP/ITP metabolism                                                                             | 6.15E-03 |
| 48                         | Development_S1P1 receptor signaling via beta-arrestin                                          | 6.41E-03 |
| 49                         | Immune response_IL-22 signaling pathway                                                        | 6.41E-03 |
| 50                         | Immune response_IFN gamma signaling pathway                                                    | 6.62E-03 |
