# Supplementary figures and images for: Na+ influx via Orai1 inhibits intracellular ATP-induced mTORC2 signaling to disrupt CD4 T cell gene expression and differentiation
Source: eLife journal article supplement (doi:10.7554/elife.25155), 2017-05-11

Figure 1 - figure supplement 1

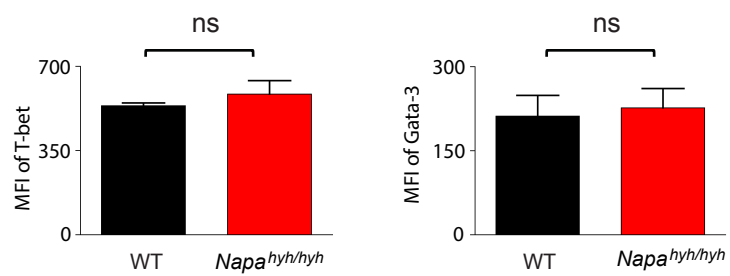

Supplement: supp [file elife-25155-supp-v2.zip]
